# Supplementary material for: Numerical Model Generation of Test Frames for Pre-launch Studies of EarthCARE’s Retrieval Algorithms and Data Management System
Source: Copernicus journal article supplement (doi:10.5194/amt-2022-300), 2022-11-21
Supplement: Supplementary file [file amt-2022-300-AC1-supplement.pdf]

Dear Editor,

Please find there our responses to the reviewers' comments. Our responses are in blue.

Sincerely,

Zhipeng Qu

## **Referee #1 (Toshi Matsui)**

**Summary:** This manuscript describes generation and validation of numerical atmosphere-surface test frames for upcoming EarthCARE satellites. Authors conducted multiple multi-scale modeling to generate high-resolution scenes of virtual atmosphere and surface across different regions. The manuscript, then, qualitatively validated generated virtual fields against the satellite observations. This is a very ambitious paper that intends to validate this many different scenes all together in a single manuscript. This is why the validation method lacks detailed quantitative analysis and non-evident arguments in ice microphysics. Other problems include lack of citations related to previous studies and lack of aerosol validation. Thus, this paper needs “major revision” to resolve aforementioned problems before publishing in AMT. Please read the major and minor comments below.

Thank you for your review and suggestions. We agree that more quantitative verification of the test frames would improve the quality of the manuscript, and some have been included in the revised version, but we also stress that this was not, at this point, the purpose of the manuscript. This is elaborated in our responses to subsequent points.

### **Major Comments:**

1) Lack of citations and discussion in the previous studies.

This numerical satellite mission frame has emerged from the last decades. We have developed a benchmark of numerical test frames before the launch of Global Precipitation Measurements (GPM) Core satellite.

Matsui, T. T. Iguchi, X. Li, M. Han, W.-K. Tao, W. Petersen, T. L'Ecuyer, R. Meneghini, W. Olson, C. D. Kummerow, A. Y. Hou, M. R. Schwaller, E. F. Stocker, J. Kwiatkowski (2013), GPM satellite simulator over ground validation sites, Bull. Amer. Meteor. Soc., 94, 1653–1660. doi: <http://dx.doi.org/10.1175/BAMS-D-12-00160.1>

For this, we have validated numerical simulation against the various measurements from the GPM field campaigns.

Iguchi T., T. Matsui, J. J. Shi, W.-K. Tao, A. P. Khain, A. Hou, R. Cifelli, A. Heymsfield, and A. Tokay (2012), Numerical analysis using WRF-SBM for the cloud microphysical structures in the

C3VP field campaign: Impacts of supercooled droplets and resultant riming on snow microphysics, *Journal of Geophysical Research*, 117, D23206, doi:10.1029/2012JD018101.

Iguchi, T., T. Matsui, A. Tokay, P. Kollias, and W.-K. Tao (2012), Two distinct modes in one-day rainfall event during MC3E field campaign: Analyses of disdrometer observations and WRF-SBM simulation. *Geophysical Research Letters*, 39, L24805, doi:10.1029/2012GL053329.

Iguchi, T., T. Matsui, W. Tao, A. Khain, V. Phillips, C. Kidd, T. L'Ecuyer, S. Braun, and A. Hou, 2014: WRF-SBM simulations of melting layer structure in mixed-phase precipitation events observed during LPVEx. *J. Appl. Meteor. Climatol.* 53, 2710-2731, doi:10.1175/JAMC-D-13-0334.1.

There should be a lot more papers related to these topics. Please search manuscripts and discuss similarities and differences between your work and other previous work in the introduction section.

Thank you for these suggestions. New text and references have been added to the introduction. While we agree with the Reviewer that verification of the test frames using independent sources of information is a worthy and very demanding task, we emphasize, in the revised version, that the test frames, as described in this manuscript, were produced expressly for end-to-end assessment of EarthCARE's algorithms and its data-handling procedures. While the frames had to be "reasonably realistic" and sufficiently large and demanding for retrieval algorithms to be tested rigorously, they were never expected to be "perfect facsimiles" and the manuscript was never intended to focus on verification of the frames via use of independent observations. In fact, given the size of the test frames, extensive verification of them would be extremely challenging and in all likelihood unsatisfactory. We tried to give a cursory indication.

"Using numerical simulation to generate atmospheric conditions for satellite algorithm development and testing is not new. These atmospheric conditions could be idealized with different spatial resolutions from tens of km to tens of meters targeting different types of cloud scene (Park et al. 2000, Voors et al. 2008). Tao et al. (2009) use multi-scale modelling system combining cloud resolving model (CRM), numerical weather prediction (NWP) model and general circulation model (GCM) with unified physics to produce atmospheric scenes at different scales. More detailed size-bin-resolving cloud microphysics scheme could also be used to produce atmospheric conditions which could be subsequently evaluated and constrained by the observations (Matsui et al. 2013, Iguchi et al. 2012a, 2012b, 2014). Zeng et al. (2020) combine high-resolution simulation with data assimilation system to produce higher quality of atmospheric scenes. Cornut et al. (2023) use also data assimilation method to incorporate MODIS retrievals of aerosols properties into the NWP simulations."

"Although different methods exist to enhance the quality of simulated atmospheric scenes, due to the known issues in numerical simulation of atmospheric condition, such as spatial/temporal displacement of simulated clouds, poor understanding of many cloud microphysical processes such as secondary ice production (Korolev and Leisner 2020), bulk assumptions in cloud microphysical schemes, etc., simulated atmospheric conditions will always be different from the reality. The main purpose of an end-to-end simulation with radiative closure assessment is to provide an efficient pathway to evaluate the performance of the retrieval algorithm of clouds and

aerosols without focusing on whether the test data represent exactly the reality. The goal then shifted to verify whether these properties are realistic enough within reasonable range and with good relationship among different variables.”

## 2) Lack of quantitative validation.

This paper intends to validate many different scenes that contain many different types of clouds and microphysics. All validation here is qualitative “eyeballs” validation. Thus, the results are stated “very good (line 209). At least, I suggest creating histograms or PDFs for each plot (Figs. 8, 9, 11, 12, 14) for more quantitative discussion in addition to existing qualitative validation. You can see Fig 1d in Matsui et al. 2014 for example.

Matsui, T., J. Santanello, J. J. Shi, W.-K. Tao, D. Wu, C. Peters-Lidard, E. Kemp, M. Chin, D. Starr, M. Sekiguchi, and F. Aires, (2014): Introducing multisensor satellite radiance-based evaluation for regional Earth System modeling, *Journal of Geophysical Research*, 119, 8450–8475, doi:10.1002/2013JD021424.

Thank you for this suggestion. We added PDFs to figure 8, 9, 11, 12, 14 and 15. Additional discussions are also added in the main text.

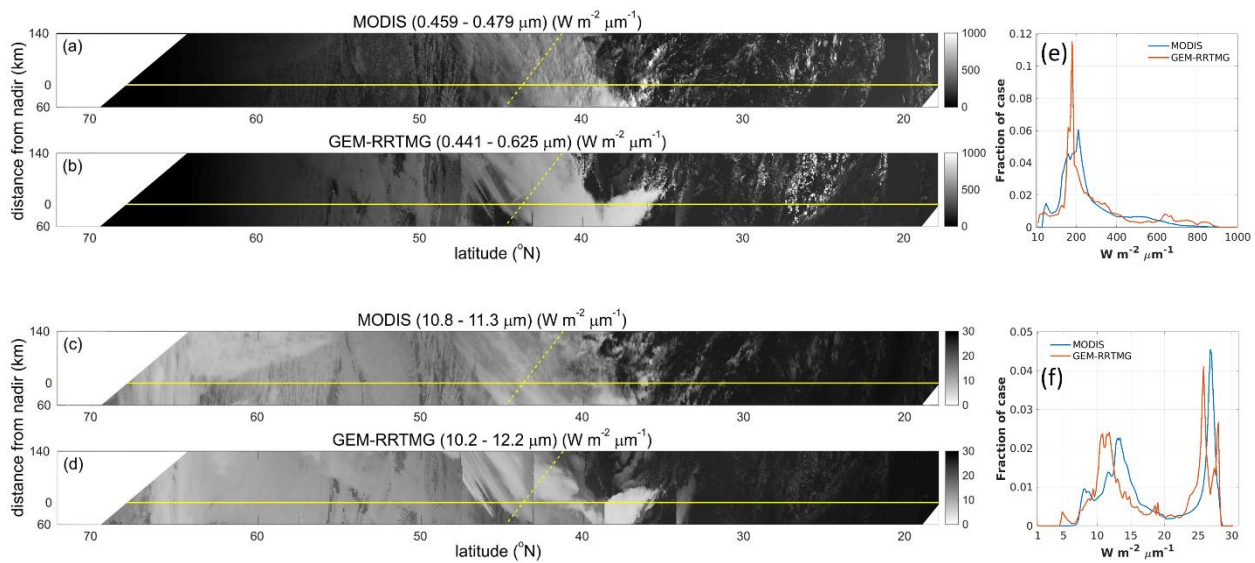

**Figure 8:** (a) MODIS TOA flux (approximated by radiance\* $\pi$ ) for band 3 (459 - 479 nm) between 17h15 and 17h35 UTC on 7-Dec-2014. (b) RRTMG simulated upward TOA flux for 441.5 - 625 nm for GEM’s simulation of the *Halifax frame*. (c) as in (a) but for band 31 (10.8-11.3 μm). (d) in as but for wavelengths 10.2 - 12.2 μm. Solid and dashed yellow lines indicate EarthCARE’s and CloudSat’s nadir-tracks. Blank areas are outside MODIS’s field-of-view. (e) fraction of case for visible bands with regard to spectral fluxes (bin size of 10 W m<sup>-2</sup> μm<sup>-1</sup> is used). (f) fraction of case for infrared bands with regard to spectral fluxes (bin size of 0.2 W m<sup>-2</sup> μm<sup>-1</sup> is used).

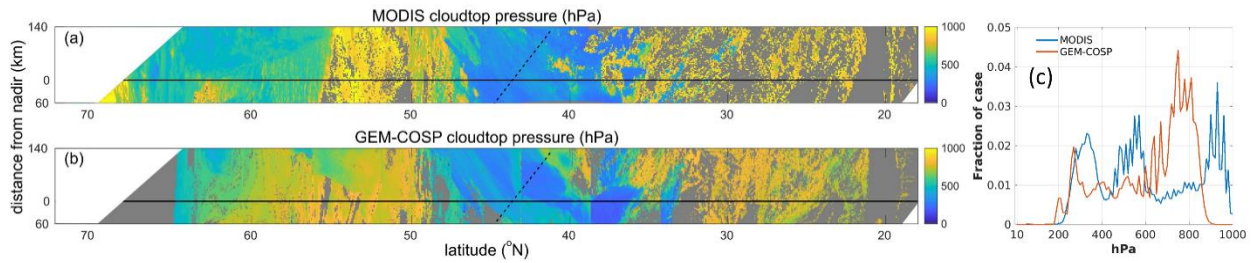

**Figure 9:** (a) MODIS cloudtop pressure (MYD06\_L2 product) between 17h15 and 17h35 UTC on 7-Dec-2014. Blank areas are outside MODIS’s field-of-view. (b) GEM’s cloudtop pressure for the *Halifax frame* based on COSP’s MODIS simulator. Grey area in the northern portion has  $\theta_0 > 90^\circ$  and so no COSP values. (c) fraction of case with regard to cloudtop pressure (bin size of 10 hPa is used).

“Figure 8a and c show MODIS spectral fluxes (MYD02HKM product; MCST 2017a) for 0.459 - 0.479  $\mu\text{m}$  and 10.8 - 11.3  $\mu\text{m}$  for the *Halifax frame*. Key cloud-related features are a cold front between  $40^\circ\text{N}$  and  $45^\circ\text{N}$ , scattered clouds to its south, and mostly overcast conditions to its north. Figure 8b and d show TOA spectral fluxes for two wavebands, close to MODIS’s bands, as simulated by the Rapid Radiative Transfer Model for GCMs (RRTMG - Mlawer et al. 1997; Iacono et al. 2000; 2008) using GEM data. At large-scales, GEM did well with respect to cloud occurrence. Figure 8e and f show the fraction of cases of visible and infrared bands with regard to different spectral fluxes, respectively. The frequencies of different spectral fluxes for both visible and infrared wavelength follow similar patterns, although some differences remain. For the GEM scenes, discontinuities, stemming from the stitching together of the semi-independent high-resolution inner-most domains, are clearly visible across the frontal system. They do not pose a serious problem for the task at hand.”

“Near  $38^\circ\text{N}$  GEM’s longwave fluxes are significantly less than MODIS’s. This is because GEM simulated widespread convection in this area whereas MODIS only observed isolated convective cells. This can be seen in Figure 8e that GEM-RRTMG shows higher frequency around  $800 \text{ W m}^{-2} \mu\text{m}^{-1}$ , and in Figure 8f that a higher frequency is observed from GEM-RRTMG around  $5 \text{ W m}^{-2} \mu\text{m}^{-1}$ . This is also apparent in Figure 9a and b, which shows cloudtop altitudes both inferred from MODIS radiances (Platnick et al. 2015) and computed by the MODIS simulator of the Cloud Feedback Model Intercomparison Project (CFMIP) Observation Simulator Package (Bodas-Salcedo et al. 2011; abbreviated as the COSP simulator). This is consistent with the overestimation of the simulated frequency by GEM-COSP (Figure 9c) near 200 hPa.”

“GEM also simulated slightly higher cloud top height for low-level clouds for the southern section between latitude  $20$  and  $30^\circ\text{N}$  and the northern section between latitude  $50$  and  $55^\circ\text{N}$ . The frequency of GEM simulated low-level clouds in Figure 9c is centered on 750 hPa, whereas MODIS retrieved clouds are lower, mostly centered on 920 hPa. This can also be inferred from Figure 8f in which higher frequencies of infrared spectral fluxes from GEM-RRTMG are found between 23 and  $25.5 \text{ W m}^{-2} \mu\text{m}^{-1}$  for the southern section and between 10 and  $12 \text{ W m}^{-2} \mu\text{m}^{-1}$  for the northern section. In addition, in Figure 9c, we also find that GEM underestimated the amount of mid-level clouds between 500 and 600 hPa. This corresponds to the region between the latitude  $55$  and  $62^\circ\text{N}$ .”

“Figure 11 compares MODIS TOA fluxes to those computed by RRTMG acting on GEM data for the Baja frame. As with the Halifax frame, agreement is generally good, though GEM’s fields exhibit some peculiarities. For instance, GEM’s fluxes associated with clouds are less variable than MODIS’s; especially between 40°N and 50°N. This could be due to both GEM’s clouds being simply too homogeneous due to missing mesoscale forcing or RRTMG’s use of 1D radiative transfer models (see Barker et al. 2017). Also, the thin high clouds near latitude 32°N, which are also evident in Figure 12 and positioned well in space, show an on-off pattern that is not seen in the observations. Furthermore, near latitude 55°N GEM failed to produce the very low and thin, but extensive, clouds. This is most apparent in Figure 12a and b. Figure 12c shows clearly the missing of these low-level clouds below 800 hPa. Finally, GEM simulated larger amount of cloud with cloudtop pressure of ~400 hPa near latitude 50°N. This is consistent with the frequency plot (Figure 12c) in which an overestimation by GEM at ~400 hPa can be clearly seen. This can also be confirmed from Figure 11e and f in which significant overestimation of frequency can be found between 620 and 730  $W m^{-2} \mu m^{-1}$  for visible band and between 7 and 10  $W m^{-2} \mu m^{-1}$  for infrared band. Note too, that the discontinuities that stem from stitching together GEM’s innermost domains are less apparent for this frame than they are for the Halifax frame, though the discontinuity near 26°N is notably bad for it stands out in both visible and IR imagery.”

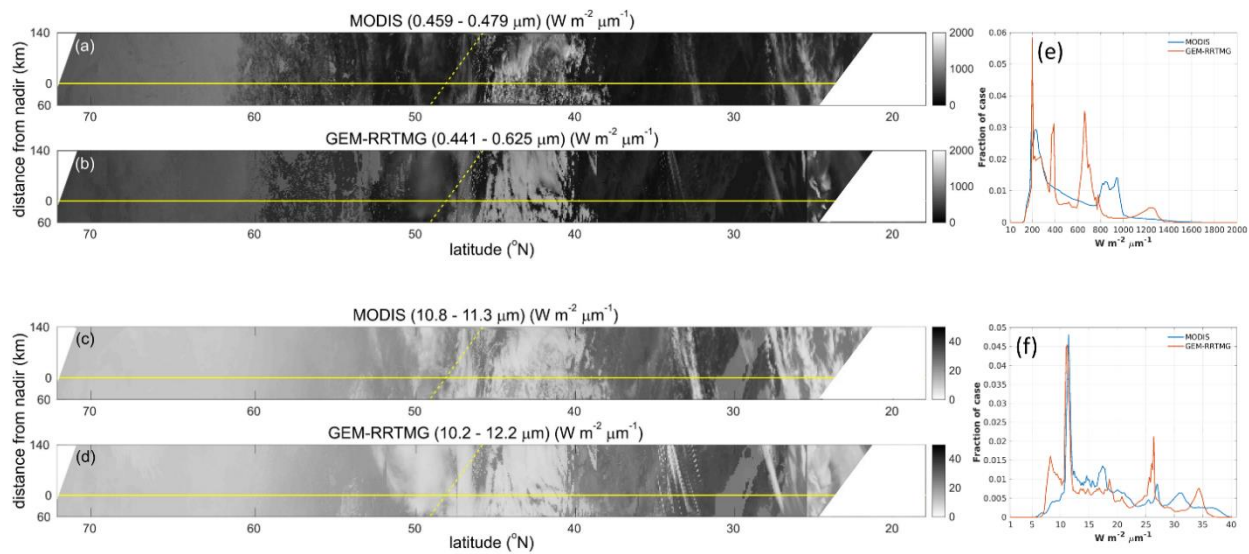

**Figure 11:** As in Figure 8 except these are for the *Baja frame*. MODIS TOA fluxes are observed between 20h10 and 20h30 UTC on 2-Apr-2015

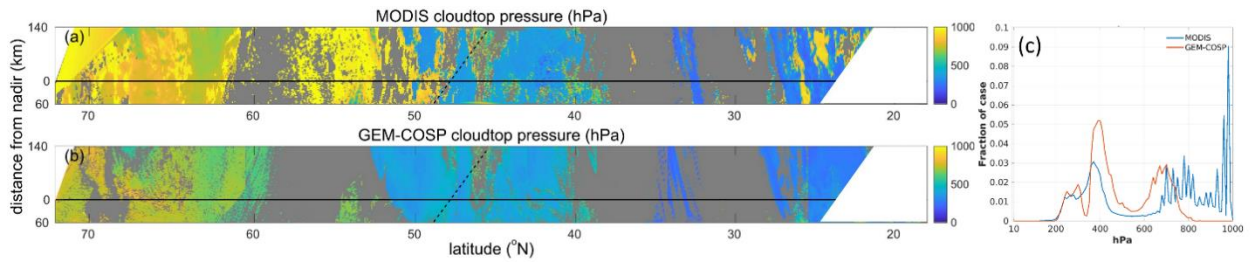

**Figure 12:** As in *Figure 9* except these are for the *Baja* frame. MODIS cloudtop pressure are retrieved between 20h10 and 20h30 UTC on 2-Apr-2015.

“Figure 14 shows that for the Hawaii frame, GEM’s positionings and approximate intensities of cloud systems near the Equator and  $\sim 25^{\circ}\text{S}$  agree well with the MODIS observations. The harsh discontinuity in GEM’s string of innermost domains near  $2^{\circ}\text{S}$  is due to a lack of high ice cloud, as seen in Figure 15, which likely stems from the lack of information, in the form of reduced outflow of high cirrus, coming into the sub-domain from the equatorial mesoscale system. Likewise, near  $15^{\circ}\text{N}$  the lack of upper-level cloud in GEM could be because this sub-domain was too disconnected from the mesoscale system to the south. The missing of high clouds in the simulation can be inferred from Figure 14e with an overestimation of frequency by GEM near  $200 \text{ W m}^{-2} \mu\text{m}^{-1}$  which resembles TOA visible fluxes from ocean surface. This missing of high clouds can also be confirmed by Figure 14f with higher frequency by GEM for warmer surface near  $27 \text{ W m}^{-2} \mu\text{m}^{-1}$ . This can also be inferred from Figure 15c in which underestimation of frequency by GEM between 100 and 200 hPa is found. Again, however, the point of this section is to show the gross verisimilitude of the test frames and hence their suitability for EarthCARE algorithm assessments.”

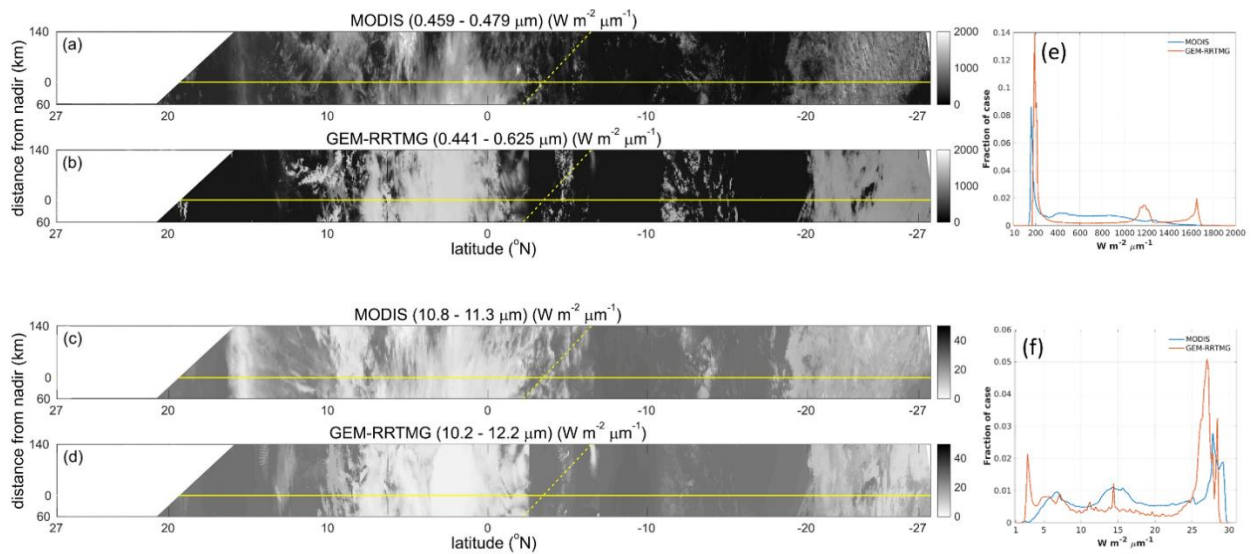

**Figure 14:** As in *Figure 8* except these are for the *Hawaii* frame. MODIS TOA fluxes are observed between 00h35 and 00h55 UTC on 24-Jun-2015

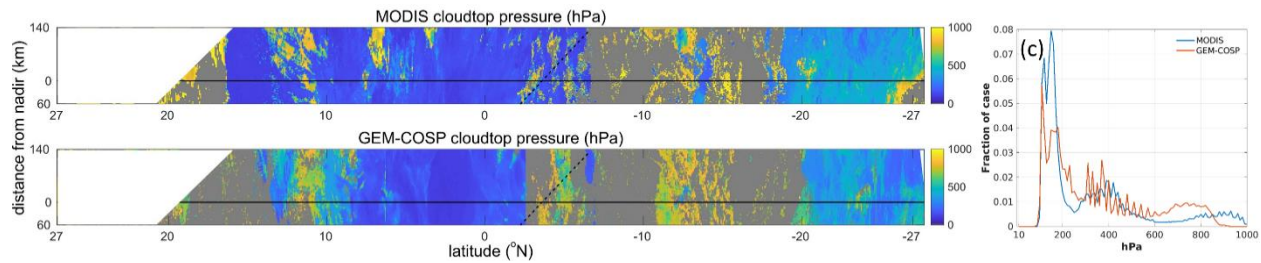

**Figure 15:** As in *Figure 9* except these are for the *Hawaii frame*. MODIS cloudtop pressure is retrieved between 00h35 and 00h55 UTC on 24-Jun-2015

I also suggest utilizing more detailed satellite simulators to generate observation-equivalent scenes. For example, RRTMG is broad-band RT. The COSP simulator does not account for details in size and phase of MY2. Detailed satellite simulator must closely follow assumptions in size distributions, phase, and shapes in cloud microphysics. You can read section 2 of above paper for more principles and radiance-based model evaluation.

The results presented in this manuscript are meant to provide an overview of the ability of the simulations to provide “reasonably realistic and large” test frames. Given this goal, we used output from the COSP simulator and RRTMG radiative fluxes. While they are not as complex or comprehensive as other systems used to simulate observations, they are one step toward the use of similar quantities to compare model output and observations. Other manuscripts in this special issue present results of applying very sophisticated instrument simulators (ATLID, CPR, MSI and BBR) to the test frames ([the list of the manuscripts](#)).

### 3) Non-evident argument of ice microphysics bias and improvement.

Section 7 argument suddenly starts with “Basically, GEM predicts too many overly small ice crystals...”. Unfortunately, I don’t see any such evidence in this manuscript or previous manuscript using MY2 microphysics. What is this argument based upon? You must show evidence using either observations or previous manuscript using MY2 in different cloud types. Then, discussion goes to “these alterations were found to .... Improvement of GEMS’s simulated cloud properties....” Again, based on what?? No evidence. Essentially Figure 17 compares Reff-T distributions before and after modification.

There are potential pathways to provide this evidence.

1. Validate against Reff products of MODIS/VIIRS satellites. Although these products have their own assumptions, it is better than nothing.
2. Simulate CloudSat reflectivity before and after the change in ice size. In this case, you must use a detailed radar simulator that accounts for size, phase, and non-sphericity of ice crystals.

Reff is the inverse function of lambda in generalized gamma distributions, thus, change in Reff can significantly impact CloudSat radar reflectivity. You can construct contoured frequency of

altitude diagrams (CFADs) or similar statistical composites. See examples Fig 10 & 11 of Shi et al. 2010 for example.

Shi, J. J., W.-K. Tao, T. Matsui, A. Hou, S. Lang, C. Peters-Lidard, G. Jackson, R. Cifelli, S. Rutledge, and W. Petersen (2010), Microphysical Properties of the January 20-22 2007 Snow Events over Canada: Comparison with in-situ and Satellite Observations. *Journal of Applied Meteorology and Climatology*. 49(11), 2246–2266.

Thank you for the suggestions. Assessment of adjustments to Reff and resulting improvements were added to the manuscript. The focus of the assessment is whether the adjustments improved the relationship between Reff and other variables (e.g., Reff\_i vs. T; Reff\_i vs. cloudtop P; and IWC vs. Reflectivity) instead of assessing whether the simulated Reff values agree well with observations.

“The impact of the adjustment of effective radius can be seen in 2D histograms in Figure 19. Figure 19a shows the fraction of cases from MODIS retrievals (MYD06\_L2) with regard to effective radius and cloudtop pressure. The effective radii of most cases with cloudtop pressure between 200 and 400 hPa are between 30 and 50  $\mu\text{m}$ . For the COSP simulated results based on the original GEM data, most of the ice clouds with same range of cloudtop pressure have very small effective radius, mostly smaller than 15  $\mu\text{m}$  (Figure 19b). After the adjustment, the results improved significantly with most cases having effective radius between 30 and 50  $\mu\text{m}$  which agrees well with the MODIS retrievals (Figure 19a).”

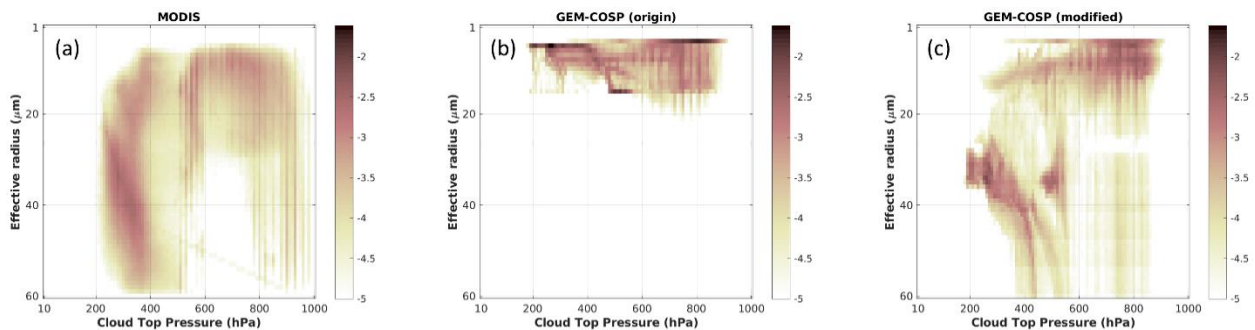

**Figure 19:** fraction of cases in logarithmic scale. Y-axis: effective radius with bin size of 1  $\mu\text{m}$ . X-axis: cloudtop pressure with bin size of 10 hPa. (a) MODIS retrieval from MYD06\_L2. (b) original GEM data simulated by MODIS simulator of COSP. (c) GEM data after the adjustments of effective radius simulated by COSP.

“In addition to these improvements in cloud optical properties, the same adjustments were found to improve the realism of cloud properties that are relevant to simulation of CPR observations. For example, after applying the adjustments the relationship between ice CWC and simulated radar reflectivity now falls in phase-space that agrees well with real observations (e.g., Matrosov and Heymsfield 2017; Heymsfield et al. 2005). Figure 20 shows the IWC-vs-Ka Band reflectivity for the nadir Halifax scene path. It can be seen that after the adjustment (Figure 20b) the best-fit line of GEM data compares well with the relationships shown in Fig 4 of Matrosov and Heymsfield et al. (2017). The agreement is even more striking if the distribution of the data shown in Matrosov and Heymsfield et al. (2017) is considered instead of just the best-fit lines (not shown). Various



cross-sections of adjusted GEM+CAMS-derived fields can be found in the Supplementary Material.”

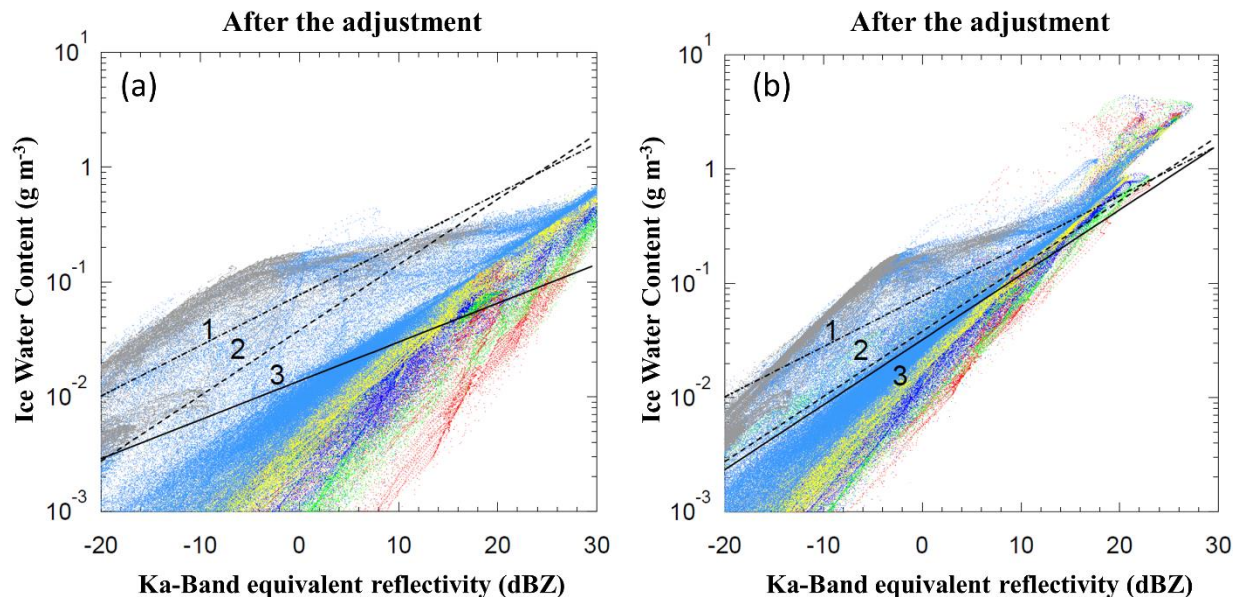

Figure 20: IWC vs Ka band equivalent reflectivity for the nadir track of the Halifax scene. Lines 1 and 2 are the best-fit line to GCPEX and CRYSTAL-FACE respectively data taken from Matrosov and Heymsfield et al. (2017). Line 3 is the best-fit data to the GEM results. The Red points are for temperatures between 0 and -5 C, Green: -10 < T < -5 C, Dark-Blue: -15 < T < -10 C, Yellow: -20 < T < -10 C, Light-Blue: -20 < T < -40 C, Grey: T < -40 C. (a) the relationship before the adjustment. (b) the relationship after the adjustment.

#### 4) Lack of aerosol validation.

Although aerosols are part of the numerical testing frame, only cloud properties are validated. Aerosols are supposed to be one of the major components of EarthCARE satellites, right? Why not validate aerosols? I understand that it is incorporated from the CAMS field, and applied ECSIM scattering properties. You can simulate these quantities and present statistical quantities. Are these realistic against existing Lidar measurements, like CALIOP/CATS sensors? See example of how to validate aerosol total backscattering in Figs 16 of Choi et al. 2020.

Choi, Y., S.-H. Chen, C.-C. Huang, K. Earl, C.-Y. Chen, C. Schwartz, and T. Matsui (2020), Evaluating the impact of assimilating aerosol optical depth observations on dust forecasts over North Africa and the East Atlantic using different data assimilation methods, *Journal of Advances in Modeling Earth Systems*, 12, e2019MS001890. <https://doi.org/10.1029/2019MS001890>

Validation of aerosols is beyond the scope of this manuscript. As mentioned in the Supplementary Materials, our goal was limited to producing ‘realistic enough’ aerosol fields for the purposes of algorithm development and testing. Hence, a large degree of tolerance for ad-hoc choices and procedures was approved and accepted by all involved. Regarding general validation of CAMS’s aerosols properties, we added text and references to relevant CAMS papers (e.g., Flemming et al. 2017).

Flemming, J., Benedetti, A., Inness, A., Engelen, R. J., Jones, L., Huijnen, V., Remy, S., Parrington, M., Suttie, M., Bozzo, A., Peuch, V.-H., Akritidis, D., and Katragkou, E., 2017: The CAMS interim Reanalysis of Carbon Monoxide, Ozone and Aerosol for 2003–2015, *Atmos. Chem. Phys.*, 17, 1945–1983, <https://doi.org/10.5194/acp-17-1945-2017>.

### **Minor Comments:**

Title: Title including “Data Management”, but I don’t see particular discussion in DM. Either omit DM from title, or add more plentiful discussion of DM.

We prefer to keep “Data Management” in the title. We added the following description at the end of the second last paragraph of the Introduction:

“Use of high-resolution, full-frame datasets in ECSIM not only allows for assessment of the quality of EarthCARE’s geophysical retrievals, it also facilitates preparation of operational computational resources and management of data produces to be generated during the mission.”

Line 13: Write acronym NWP in abstract.

We changed the text to “Numerical Weather Prediction (NWP)”

Line 39: “ensemble” does not sound right. It probably means “diverse surface-atmosphere scene”

We changed the wording to “surface-atmosphere conditions”

Line 112-115: Is PBL scheme and shallow convection scheme applied to which domains (coarse grid only)?

We added a statement at the end of the paragraph:

“Both schemes are used in all domains.”

Elsewhere: “inner-domains” should be “inner-most domains”.

The changes were made.

Line 127: “Saved variables are listed in the Appendix” but I guess it’s also available in Table 5??

We agree this could be confusing, so we’ve renamed them as Table A1 and Table A2.

Line 138-142: Equations of spectral and white albedo can be omitted since they’re not very important for this paper. Just a reference is enough or say “white albedo is used for diffuse radiation”.

For the convenience of readers, we prefer to keep the equations in the manuscript so that users of the test frames can compute the albedos.

Line 149: Please put a citation for “another emissivity database”, although I understood it is more discussed in the companion paper.

The reference is added into the manuscript.

“Huang, X., Chen, X., Zhou, D. K., & Liu, X.: An observationally based global band-by-band surface emissivity dataset for climate and weather simulations. *J. Atmos. Sci.*, 73(9), 3541– 3555. <https://doi.org/10.1175/jas-d-15-0355.1>, 2016.”

Line 172: Omit sentence “While annoying to look at,”

The change was made.

Line 187 & Figure 10: “making a comparison to GEM useless” This statement is too strong.

We changed the wording to be,

“Unfortunately, CloudSat’s retrieval of liquid CWC is problematic (e.g., Li et al. 2018). The comparison of liquid CWC is therefore not shown.”

Line 195: 1D RT is not the major reason to create homogeneous brightness temperature. Misrepresentation of cloud structures due to missing mesoscale forcing should be the main reason.

We change the phrase as:

“This could be due to GEM’s clouds being simply too homogeneous due to missing mesoscale forcing as well as RRTMG’s use of 1D radiative transfer models (see Barker et al. 2017).”

Line 209: “very good” is too qualitative and vague a statement (not scientific statement).

We changed the phrase as:

“Figure 14 shows that for the Hawaii frame, the location and intensity of cloud systems simulated by GEM near the Equator and ~25°S agrees well with MODIS observations.”

Line 230: “by algorithm development groups (...” should be “in the previous section.”

We changed the phrase as:

“While the macrophysical cloud properties simulated by GEM were deemed satisfactory in the previous section, it was clear that there were shortcomings with its predicted ice cloud microphysical properties (cf. Qu et al. 2018).”
